# Supplementary material
Source: PubMed Central journal article supplement (PMC1890834)
Supplement: blood_blood-2006-11-058040_1.pdf [file blood_blood-2006-11-058040_1.pdf]

| Gene/SNP       | Levels | N <sup>‡</sup> | % Dead | HR <sup>†</sup> | 95% CI    | Gene/SNP       | Levels | N <sup>‡</sup> | % Dead | HR <sup>†</sup> | 95% CI           |
|----------------|--------|----------------|--------|-----------------|-----------|----------------|--------|----------------|--------|-----------------|------------------|
| <b>CARD15*</b> | CC     | 104            | 21.2%  | 1.00            | reference | <b>CARD15*</b> | CC     | 179            | 21.2%  | 1.00            | reference        |
| rs2066842      | CT     | 64             | 23.4%  | 1.34            | 0.69-2.60 | rs2066844      | CT     | 12             | 16.7%  | 0.86            | 0.20-3.61        |
| P268S          | TT     | 16             | 12.5%  | 0.86            | 0.19-3.77 | R702W          | TT     | 0              | 0.0%   |                 |                  |
| Ex4+156C→T     | Total  | 184            |        |                 | p=0.67    | Ex4-359C→T     | Total  | 191            |        |                 | p=0.84           |
|                | CT/TT  | 80             | 21.3%  | 1.27            | 0.66-2.40 |                | CT/TT  | 12             | 16.7%  | 0.86            | 0.20-3.61        |
| <b>CARD15</b>  | --     | 265            | 21.9%  |                 |           | <b>CCR2</b>    | GG     | 215            | 20.5%  | 1.00            | reference        |
| rs2066847      | +-     | 6              | 0.0%   |                 |           | rs1799864      | AG     | 46             | 21.7%  | 1.20            | 0.60-2.40        |
| Ex11-35→C      | ++     | 0              | 0.0%   |                 |           | V64I           | AA     | 6              | 16.7%  | 0.52            | 0.07-3.83        |
|                | Total  | 271            |        |                 |           | Ex2+241G→A     | Total  | 267            |        |                 | p=0.93           |
|                | +/-++  | 6              | 0.0%   |                 |           |                | AG/AA  | 52             | 21.2%  | 1.07            | 0.55-2.08        |
| <b>CCR5</b>    | ++     | 218            | 22.5%  | 1.00            | reference | <b>CTLA4</b>   | AA     | 96             | 25.0%  | 1.00            | reference        |
| rs333          | +-     | 44             | 11.4%  | 0.57            | 0.22-1.43 | rs231775       | AG     | 114            | 18.4%  | 0.58            | 0.31-1.04        |
| Δ32            | --     | 4              | 0.0%   |                 |           | T17A           | GG     | 47             | 23.4%  | 0.96            | 0.46-1.98        |
|                | Total  | 266            |        |                 | p=0.16    | Ex1-61A→G      | Total  | 257            |        |                 | p=0.55           |
|                | +/---  | 48             | 10.4%  | 0.53            | 0.21-1.34 |                | AG/GG  | 161            | 19.9%  | 0.67            | 0.39-1.15        |
| <b>CSF3*</b>   | GG     | 76             | 22.4%  | 1.00            | reference | <b>CX3CR1*</b> | GG     | 96             | 22.9%  | 1.00            | reference        |
| rs25645        | AG     | 79             | 20.3%  | 0.98            | 0.48-1.94 | rs3732379      | AG     | 77             | 19.5%  | 1.04            | 0.52-2.04        |
| L185L          | AA     | 28             | 21.4%  | 0.90            | 0.34-2.32 | V249I          | AA     | 14             | 14.3%  | 0.62            | 0.14-2.68        |
| Ex4+96G→A      | Total  | 183            |        |                 | p=0.84    | Ex2+754G→A     | Total  | 187            |        |                 | p=0.70           |
|                | AG/AA  | 107            | 20.6%  | 0.95            | 0.50-1.81 |                | AG/AA  | 91             | 18.7%  | 0.96            | 0.49-1.84        |
| <b>CXCL12</b>  | GG     | 179            | 21.8%  | 1.00            | reference | <b>FCGR2A</b>  | GG     | 51             | 29.4%  | <b>1.00</b>     | <b>reference</b> |
| rs1801157      | AG     | 83             | 20.5%  | 0.95            | 0.53-1.68 | rs1801274      | AG     | 137            | 20.4%  | <b>0.66</b>     | <b>0.34-1.23</b> |
| 3'UTR          | AA     | 10             | 20.0%  | 0.60            | 0.14-2.49 | H165R          | AA     | 83             | 15.7%  | <b>0.46</b>     | <b>0.21-0.96</b> |
|                | Total  | 272            |        |                 | p=0.55    | Ex4-120A→G     | Total  | 271            |        |                 | <b>p=0.04</b>    |
|                | AG/AA  | 93             | 20.4%  | 0.89            | 0.51-1.55 |                | AG/AA  | 220            | 18.6%  | <b>0.58</b>     | <b>0.31-1.04</b> |
| <b>ICAM1</b>   | AA     | 262            | 19.5%  | 1.00            | reference | <b>IFNG</b>    | AA     | 143            | 21.0%  | 1.00            | reference        |
| rs5491         | AT     | 5              | 40.0%  | 1.56            | 0.37-6.52 | rs1861494      | AG     | 96             | 21.9%  | 1.01            | 0.57-1.77        |
| K56M           | TT     | 1              | 100.0% | 2.56            | 0.32-19.9 | IVS3+284G→A    | GG     | 21             | 23.8%  | 1.37            | 0.52-3.56        |
| Ex2+100A→T     | Total  | 268            |        |                 | p=0.29    |                | Total  | 260            |        |                 | p=0.65           |
|                | AT/TT  | 6              | 50.0%  | 1.78            | 0.53-5.89 |                | AG/GG  | 117            | 22.2%  | 1.06            | 0.62-1.80        |
| <b>IFNA1*</b>  | TT     | 148            | 20.9%  | 1.00            | reference | <b>IFNGR1*</b> | AA     | 152            | 20.4%  | 1.00            | reference        |
| rs1758566      | CT     | 31             | 25.8%  | 1.47            | 0.66-3.27 | rs3799488      | AG     | 36             | 22.2%  | 0.95            | 0.43-2.07        |
| 5'UTR          | CC     | 2              | 0.0%   | 0.00            | 0 -       | IVS6-4G→A      | GG     | 3              | 33.3%  | 2.06            | 0.27-15.6        |
| Ex1+51T→C      | Total  | 181            |        |                 | p=0.53    |                | Total  | 191            |        |                 | p=0.84           |
|                | CT/CC  | 33             | 24.2%  | 1.40            | 0.62-3.10 |                | AG/GG  | 39             | 23.1%  | 1.01            | 0.48-2.13        |
| <b>IFNG</b>    | TT     | 120            | 18.3%  | 1.00            | reference | <b>IL1A</b>    | GG     | 131            | 21.4%  | 1.00            | reference        |
| rs2069705      | CT     | 103            | 26.2%  | 1.22            | 0.68-2.15 | rs17561        | GT     | 111            | 20.7%  | 0.93            | 0.53-1.61        |
| C-1615T        | CC     | 36             | 16.7%  | 0.97            | 0.39-2.39 | A114S          | TT     | 27             | 22.2%  | 0.94            | 0.38-2.27        |
|                | Total  | 259            |        |                 | p=0.81    | Ex5+21G→T      | Total  | 269            |        |                 | p=0.81           |
|                | CT/CC  | 139            | 23.7%  | 1.16            | 0.67-2.00 |                | GT/TT  | 138            | 21.0%  | 0.93            | 0.55-1.56        |
| <b>IFNGR2</b>  | AA     | 190            | 19.5%  | 1.00            | reference | <b>IL1B</b>    | CC     | 130            | 20.8%  | 1.00            | reference        |
| rs9808753      | AG     | 75             | 25.3%  | 1.06            | 0.59-1.85 | rs16944        | CT     | 109            | 20.2%  | 1.12            | 0.62-1.99        |
| Q64R           | GG     | 7              | 14.3%  | 0.60            | 0.08-4.40 | C-511T         | TT     | 36             | 22.2%  | 0.89            | 0.40-1.96        |
| Ex2-16A→G      | Total  | 272            |        |                 | p=0.91    |                | Total  | 275            |        |                 | p=0.92           |
|                | AG/GG  | 82             | 24.4%  | 1.02            | 0.58-1.77 |                | CT/TT  | 145            | 20.7%  | 1.04            | 0.61-1.76        |
| <b>IL1A</b>    | CC     | 129            | 20.9%  | 1.00            | reference |                |        |                |        |                 |                  |
| rs1800587      | CT     | 116            | 19.0%  | 0.87            | 0.49-1.52 |                |        |                |        |                 |                  |
| C-889T         | TT     | 30             | 30.0%  | 1.22            | 0.57-2.60 |                |        |                |        |                 |                  |
| Ex1+12C→T      | Total  | 275            |        |                 | p=0.84    |                |        |                |        |                 |                  |
|                | CT/TT  | 146            | 21.2%  | 0.95            | 0.56-1.58 |                |        |                |        |                 |                  |

|                                                     |       |     |       |             |                  |                                                   |       |     |        |             |                  |
|-----------------------------------------------------|-------|-----|-------|-------------|------------------|---------------------------------------------------|-------|-----|--------|-------------|------------------|
| <b>IL1B</b><br>rs1143627<br>C-31T                   | TT    | 130 | 20.8% | 1.00        | reference        | <b>IL1B</b><br>rs1143634<br>C3954T<br>F105F       | CC    | 160 | 22.5%  | 1.00        | reference        |
|                                                     | CT    | 106 | 20.8% | 1.17        | 0.65-2.07        |                                                   | CT    | 98  | 18.4%  | 0.86        | 0.48-1.53        |
|                                                     | CC    | 38  | 23.7% | 0.93        | 0.43-1.98        |                                                   | TT    | 16  | 25.0%  | 0.93        | 0.32-2.61        |
|                                                     | Total | 274 |       |             | p=0.99           |                                                   | Total | 274 |        |             | p=0.68           |
|                                                     | CT/CC | 144 | 21.5% | 1.08        | 0.64-1.82        |                                                   | CT/TT | 114 | 19.3%  | 0.87        | 0.50-1.49        |
| <b>IL1RN</b><br>rs454078<br>IVS6+59A→T<br>aka A9589 | AA    | 151 | 26.5% | <b>1.00</b> | reference        | <b>IL2</b><br>rs2069762<br>-384 T→G               | TT    | 141 | 19.1%  | <b>1.00</b> | reference        |
|                                                     | AT    | 111 | 14.4% | <b>0.48</b> | <b>0.26-0.86</b> |                                                   | GT    | 113 | 23.0%  | <b>1.68</b> | <b>0.96-2.92</b> |
|                                                     | TT    | 12  | 16.7% | <b>0.70</b> | <b>0.16-2.90</b> |                                                   | GG    | 17  | 29.4%  | <b>3.02</b> | <b>1.13-8.02</b> |
|                                                     | Total | 274 |       |             | <b>p=0.03</b>    |                                                   | Total | 271 |        |             | <b>p=0.01</b>    |
|                                                     | AT/TT | 123 | 14.6% | <b>0.50</b> | <b>0.28-0.87</b> |                                                   | GT/GG | 130 | 23.8%  | <b>1.81</b> | <b>1.06-3.07</b> |
| <b>IL3*</b><br>rs40401<br>Ex1-84C→T<br>P27S         | CC    | 118 | 24.6% | 1.00        | reference        | <b>IL4</b><br>rs2070874<br>5'UTR<br>Ex1-168C→T    | CC    | 192 | 24.0%  | 1.00        | reference        |
|                                                     | CT    | 61  | 16.4% | 0.71        | 0.34-1.46        |                                                   | CT    | 68  | 13.2%  | 0.53        | 0.25-1.09        |
|                                                     | TT    | 7   | 0.0%  |             |                  |                                                   | TT    | 11  | 27.3%  | 1.01        | 0.31-3.28        |
|                                                     | Total | 186 |       |             | p=0.13           |                                                   | Total | 271 |        |             | p=0.25           |
|                                                     | CT/TT | 68  | 14.7% | 0.63        | 0.30-1.29        |                                                   | CT/TT | 79  | 15.2%  | 0.60        | 0.31-1.14        |
| <b>IL4</b><br>rs2243248<br>T-1098G                  | TT    | 232 | 20.3% | 1.00        | reference        | <b>IL4</b><br>rs2243250<br>C-524T                 | CC    | 186 | 23.7%  | 1.00        | reference        |
|                                                     | GT    | 37  | 29.7% | 1.57        | 0.79-3.11        |                                                   | CT    | 68  | 13.2%  | 0.53        | 0.25-1.09        |
|                                                     | GG    | 5   | 0.0%  | 0.00        | 0 -              |                                                   | TT    | 16  | 31.3%  | 1.07        | 0.41-2.77        |
|                                                     | Total | 274 |       |             | p=0.89           |                                                   | Total | 270 |        |             | p=0.38           |
|                                                     | GT/GG | 42  | 26.2% | 1.28        | 0.65-2.51        |                                                   | CT/TT | 84  | 16.7%  | 0.64        | 0.34-1.18        |
| <b>IL4R</b><br>rs2107356<br>C-29429T                | CC    | 104 | 23.1% | 1.00        | reference        | <b>IL5</b><br>rs2069807<br>C-1551T                | CC    | 261 | 19.5%  | <b>1.00</b> | reference        |
|                                                     | CT    | 125 | 22.4% | 0.99        | 0.57-1.72        |                                                   | CT    | 2   | 50.0%  | <b>2.02</b> | <b>0.27-14.9</b> |
|                                                     | TT    | 41  | 9.8%  | 0.41        | 0.14-1.18        |                                                   | TT    | 1   | 100.0% | <b>3.45</b> | <b>0.44-26.8</b> |
|                                                     | Total | 270 |       |             | p=0.17           |                                                   | Total | 264 |        |             | <b>p=0.18</b>    |
|                                                     | CT/TT | 166 | 19.3% | 0.84        | 0.49-1.44        |                                                   | CT/TT |     |        | <b>2.54</b> | <b>0.59-10.8</b> |
| <b>IL5</b><br>rs2069812<br>C-745T                   | CC    | 124 | 24.2% | 1.00        | reference        | <b>IL5*</b><br>rs2069818<br>C-1551T               | CC    | 181 | 19.9%  | <b>1.00</b> | reference        |
|                                                     | CT    | 112 | 15.2% | 0.67        | 0.36-1.23        |                                                   | AC    | 3   | 100.0% | <b>5.58</b> | <b>1.66-18.6</b> |
|                                                     | TT    | 33  | 24.2% | 0.90        | 0.40-1.96        |                                                   | AA    | 0   | 0.0%   |             |                  |
|                                                     | Total | 269 |       |             | p=0.46           |                                                   | Total | 184 |        |             | <b>p=0.005</b>   |
|                                                     | CT/TT | 145 | 17.2% | 0.73        | 0.42-1.25        |                                                   | AC/AA | 3   | 100.0% | <b>5.58</b> | <b>1.66-18.6</b> |
| <b>IL6</b><br>rs1800795<br>G-174C                   | GG    | 119 | 21.8% | 1.00        | reference        | <b>IL6</b><br>rs1800797<br>G-597A                 | GG    | 119 | 21.8%  | 1.00        | reference        |
|                                                     | CG    | 109 | 22.0% | 1.20        | 0.68-2.10        |                                                   | AG    | 110 | 21.8%  | 1.20        | 0.68-2.10        |
|                                                     | CC    | 47  | 17.0% | 0.79        | 0.35-1.74        |                                                   | AA    | 41  | 17.1%  | 0.79        | 0.34-1.83        |
|                                                     | Total | 275 |       |             | p=0.77           |                                                   | Total | 270 |        |             | p=0.83           |
|                                                     | CG/CC | 156 | 20.5% | 1.06        | 0.62-1.77        |                                                   | AG/AA | 151 | 20.5%  | 1.07        | 0.63-1.81        |
| <b>IL7R*</b><br>rs1494555<br>V138I<br>Ex4+33G→A     | AA    | 98  | 24.5% | 1.00        | reference        | <b>IL8</b><br>rs4073<br>A-351T<br>aka -251        | TT    | 68  | 33.8%  | <b>1.00</b> | reference        |
|                                                     | AG    | 73  | 19.2% | 0.76        | 0.39-1.47        |                                                   | AT    | 133 | 14.3%  | <b>0.41</b> | <b>0.22-0.76</b> |
|                                                     | GG    | 19  | 10.5% | 0.58        | 0.13-2.47        |                                                   | AA    | 60  | 23.3%  | <b>0.57</b> | <b>0.28-1.10</b> |
|                                                     | Total | 190 |       |             | p=0.31           |                                                   | Total | 261 |        |             | <b>p=0.06</b>    |
|                                                     | AG/GG | 92  | 17.4% | 0.73        | 0.38-1.38        |                                                   | AT/AA | 193 | 17.1%  | <b>0.47</b> | <b>0.27-0.79</b> |
| <b>IL8</b><br>rs2227306<br>C+781T                   | CC    | 91  | 31.9% | <b>1.00</b> | reference        | <b>IL8</b><br>rs2227307<br>G+396T                 | TT    | 73  | 31.5%  | <b>1.00</b> | reference        |
|                                                     | CT    | 124 | 14.5% | <b>0.47</b> | <b>0.25-0.84</b> |                                                   | GT    | 133 | 15.0%  | <b>0.49</b> | <b>0.26-0.88</b> |
|                                                     | TT    | 43  | 20.9% | <b>0.64</b> | <b>0.30-1.36</b> |                                                   | GG    | 55  | 23.6%  | <b>0.62</b> | <b>0.31-1.23</b> |
|                                                     | Total | 258 |       |             | <b>p=0.07</b>    |                                                   | Total | 261 |        |             | <b>p=0.11</b>    |
|                                                     | CT/TT | 167 | 16.2% | <b>0.52</b> | <b>0.30-0.87</b> |                                                   | GT/GG | 188 | 17.6%  | <b>0.53</b> | <b>0.31-0.91</b> |
| <b>IL8RB</b><br>rs1126579<br>Ex3+1235T→C            | CC    | 74  | 27.0% | <b>1.00</b> | reference        | <b>IL8RB</b><br>rs1126580<br>3'UTR<br>Ex3+1010G→A | AA    | 89  | 28.1%  | <b>1.00</b> | reference        |
|                                                     | CT    | 138 | 13.0% | <b>0.34</b> | <b>0.17-0.64</b> |                                                   | AG    | 129 | 15.5%  | <b>0.50</b> | <b>0.27-0.90</b> |
|                                                     | TT    | 53  | 28.3% | <b>0.80</b> | <b>0.40-1.57</b> |                                                   | GG    | 45  | 17.8%  | <b>0.59</b> | <b>0.26-1.31</b> |
|                                                     | Total | 265 |       |             | <b>p=0.40</b>    |                                                   | Total | 263 |        |             | <b>p=0.07</b>    |
|                                                     | CT/TT | 191 | 17.3% | <b>0.46</b> | <b>0.25-0.80</b> |                                                   | AG/GG | 174 | 16.1%  | <b>0.52</b> | <b>0.29-0.90</b> |
| <b>IL8RB*</b><br>rs2230054<br>L262L<br>Ex3+811C→T   | TT    | 44  | 27.3% | <b>1.00</b> | reference        | <b>IL9*</b><br>rs1799962<br>-350A→G               | AA    | 162 | 20.4%  | 1.00        | reference        |
|                                                     | CT    | 101 | 13.9% | <b>0.37</b> | <b>0.16-0.81</b> |                                                   | AG    | 18  | 27.8%  | 1.55        | 0.59-4.03        |
|                                                     | CC    | 45  | 31.1% | <b>0.91</b> | <b>0.41-2.00</b> |                                                   | GG    | 0   | 0.0%   |             | -                |
|                                                     | Total | 190 |       |             | <b>p=0.96</b>    |                                                   | Total | 180 |        |             | p=0.37           |
|                                                     | CT/CC | 146 | 19.2% | <b>0.52</b> | <b>0.25-1.05</b> |                                                   | AG/GG | 18  | 27.8%  | 1.55        | 0.59-4.03        |

|                                                |       |     |       |             |                  |                                                              |       |     |       |             |                  |
|------------------------------------------------|-------|-----|-------|-------------|------------------|--------------------------------------------------------------|-------|-----|-------|-------------|------------------|
| <b>IL9R*</b><br>rs6522<br>E239Q                | GG    | 184 | 21.2% |             |                  | <b>IL10</b><br>rs1800871<br>C-819T                           | CC    | 156 | 24.4% | 1.00        | reference        |
|                                                | CG    | 0   | 0.0%  |             |                  |                                                              | CT    | 99  | 14.1% | 0.57        | 0.31-1.06        |
|                                                | CC    | 0   | 0.0%  |             |                  |                                                              | TT    | 18  | 27.8% | 0.91        | 0.35-2.36        |
|                                                | Total | 184 |       |             |                  |                                                              | Total | 273 |       |             | p=0.24           |
|                                                | CG/CC | 0   | 0.0%  |             |                  |                                                              | CT/TT | 117 | 16.2% | 0.64        | 0.36-1.10        |
| <b>IL10</b><br>rs1800872<br>C-592A             | CC    | 154 | 24.0% | 1.00        | reference        | <b>IL10</b><br>rs1800890<br>T-3575A                          | TT    | 103 | 23.3% | 1.00        | reference        |
|                                                | AC    | 100 | 15.0% | 0.62        | 0.33-1.12        |                                                              | AT    | 128 | 21.1% | 0.96        | 0.55-1.66        |
|                                                | AA    | 18  | 27.8% | 0.90        | 0.34-2.33        |                                                              | AA    | 43  | 16.3% | 0.63        | 0.26-1.45        |
|                                                | Total | 272 |       |             | p=0.28           |                                                              | Total | 274 |       |             | p=0.34           |
|                                                | AC/AA | 118 | 16.9% | 0.67        | 0.38-1.15        |                                                              | AT/AA | 171 | 19.9% | 0.86        | 0.51-1.46        |
| <b>IL10</b><br>rs1800896<br>A-1082G            | AA    | 82  | 20.7% | 1.00        | reference        | <b>IL10RA</b><br>rs9610<br>3'UTR<br>Ex7-109G→A               | GG    | 81  | 24.7% | 1.00        | reference        |
|                                                | AG    | 126 | 21.4% | 1.12        | 0.60-2.07        |                                                              | AG    | 145 | 19.3% | 0.87        | 0.48-1.54        |
|                                                | GG    | 65  | 21.5% | 0.93        | 0.45-1.90        |                                                              | AA    | 48  | 20.8% | 0.90        | 0.42-1.93        |
|                                                | Total | 273 |       |             | p=0.87           |                                                              | Total | 274 |       |             | p=0.73           |
|                                                | AG/GG | 191 | 21.5% | 1.05        | 0.59-1.86        |                                                              | AG/AA | 193 | 19.7% | 0.88        | 0.50-1.51        |
| <b>IL12A</b><br>rs568408<br>G8685A             | GG    | 204 | 21.1% | 1.00        | reference        | <b>IL12B</b><br>rs3212227<br>3'UTR<br>Ex8+159A→C<br>aka 1188 | AA    | 158 | 16.5% | <b>1.00</b> | <b>reference</b> |
|                                                | AG    | 63  | 23.8% | 1.24        | 0.68-2.24        |                                                              | AC    | 91  | 23.1% | <b>1.68</b> | <b>0.93-2.99</b> |
|                                                | AA    | 6   | 0.0%  |             |                  |                                                              | CC    | 20  | 45.0% | <b>3.95</b> | <b>1.79-8.68</b> |
|                                                | Total | 273 |       |             | p=0.90           |                                                              | Total | 269 |       |             | <b>p=0.0009</b>  |
|                                                | AG/AA | 69  | 21.7% | 1.15        | 0.63-2.08        |                                                              | AC/CC | 111 | 27.0% | <b>2.01</b> | <b>1.18-3.42</b> |
| <b>IL13</b><br>rs20541<br>Q144R<br>Ex4+98A→G   | GG    | 179 | 16.2% | <b>1.00</b> | <b>reference</b> | <b>IL13</b><br>rs1800925<br>C-1069T                          | CC    | 182 | 18.1% | <b>1.00</b> | <b>reference</b> |
|                                                | AG    | 80  | 27.5% | <b>1.90</b> | <b>1.08-3.31</b> |                                                              | CT    | 74  | 23.0% | <b>1.37</b> | <b>0.75-2.48</b> |
|                                                | AA    | 7   | 14.3% | <b>0.61</b> | <b>0.08-4.54</b> |                                                              | TT    | 19  | 42.1% | <b>2.62</b> | <b>1.17-5.83</b> |
|                                                | Total | 266 |       |             | <b>p=0.16</b>    |                                                              | Total | 275 |       |             | <b>p=0.03</b>    |
|                                                | AG/AA | 87  | 26.4% | <b>1.74</b> | <b>1.00-3.03</b> |                                                              | CT/TT | 93  | 26.9% | <b>1.60</b> | <b>0.93-2.72</b> |
| <b>IL15</b><br>rs10833<br>3'UTR<br>Ex9-66T→C   | CC    | 120 | 17.5% | 1.00        | reference        | <b>IL15RA</b><br>rs2296135<br>3'UTR<br>Ex8-361A→C            | GG    | 86  | 17.4% | 1.00        | reference        |
|                                                | CT    | 106 | 24.5% | 1.46        | 0.82-2.60        |                                                              | GT    | 127 | 25.2% | 1.47        | 0.79-2.72        |
|                                                | TT    | 34  | 23.5% | 1.48        | 0.65-3.34        |                                                              | TT    | 46  | 19.6% | 1.69        | 0.72-3.95        |
|                                                | Total | 260 |       |             | p=0.21           |                                                              | Total | 259 |       |             | p=0.17           |
|                                                | CT/TT | 140 | 24.3% | 1.47        | 0.84-2.52        |                                                              | GT/TT | 173 | 23.7% | 1.51        | 0.83-2.73        |
| <b>IL16</b><br>rs859<br>3'UTR<br>Ex22+871A→G   | AA    | 143 | 21.7% | 1.00        | reference        | <b>IL16</b><br>rs11325<br>3'UTR<br>Ex22+889G→T               | GG    | 183 | 16.9% | 1.00        | reference        |
|                                                | AG    | 98  | 19.4% | 1.02        | 0.57-1.82        |                                                              | GT    | 83  | 30.1% | 1.62        | 0.95-2.74        |
|                                                | GG    | 25  | 16.0% | 0.78        | 0.27-2.21        |                                                              | TT    | 6   | 33.3% | 1.80        | 0.41-7.70        |
|                                                | Total | 266 |       |             | p=0.76           |                                                              | Total | 272 |       |             | p=0.07           |
|                                                | AG/GG | 123 | 18.7% | 0.97        | 0.56-1.67        |                                                              | GT/TT | 89  | 30.3% | 1.63        | 0.96-2.73        |
| <b>JAK3*</b><br>rs3008<br>3'UTR<br>Ex23+291A→G | CC    | 44  | 20.5% | 1.00        | reference        | <b>JAK3*</b><br>rs3212713<br>IVS1+42A→G                      | GG    | 87  | 24.1% | 1.00        | reference        |
|                                                | CT    | 100 | 22.0% | 1.00        | 0.45-2.18        |                                                              | AG    | 70  | 21.4% | 1.15        | 0.57-2.26        |
|                                                | TT    | 47  | 19.1% | 0.86        | 0.33-2.18        |                                                              | AA    | 26  | 11.5% | 0.44        | 0.13-1.49        |
|                                                | Total | 191 |       |             | p=0.74           |                                                              | Total | 183 |       |             | p=0.34           |
|                                                | CT/TT | 147 | 21.1% | 0.96        | 0.45-2.02        |                                                              | AG/AA | 96  | 18.8% | 0.90        | 0.47-1.69        |
| <b>LTA</b><br>rs909253<br>A252G                | AA    | 122 | 23.8% | 1.00        | reference        | <b>LTA</b><br>rs2239704<br>C-91A                             | CC    | 94  | 20.2% | 1.00        | reference        |
|                                                | AG    | 117 | 20.5% | 0.87        | 0.50-1.50        |                                                              | AC    | 118 | 22.9% | 1.22        | 0.67-2.20        |
|                                                | GG    | 36  | 13.9% | 0.49        | 0.18-1.27        |                                                              | AA    | 33  | 27.3% | 1.18        | 0.51-2.67        |
|                                                | Total | 275 |       |             | p=0.16           |                                                              | Total | 245 |       |             | p=0.60           |
|                                                | AG/GG | 153 | 19.0% | 0.77        | 0.45-1.29        |                                                              | AC/AA | 151 | 23.8% | 1.21        | 0.68-2.12        |
| <b>MBL2*</b><br>rs7095891<br>-65T→C            | CC    | 107 | 22.4% | 1.00        | reference        | <b>MBL2*</b><br>rs11595876<br>Ex4+1509A→G                    | AA    | 158 | 21.5% | 1.00        | reference        |
|                                                | CT    | 64  | 18.8% | 0.82        | 0.40-1.65        |                                                              | AG    | 26  | 19.2% | 1.04        | 0.40-2.67        |
|                                                | TT    | 10  | 20.0% | 0.61        | 0.13-2.63        |                                                              | GG    | 0   |       |             |                  |
|                                                | Total | 181 |       |             | p=0.42           |                                                              | Total | 184 |       |             | p=0.94           |
|                                                | CT/TT | 74  | 18.9% | 0.79        | 0.40-1.53        |                                                              | AG/GG | 26  | 19.2% | 1.04        | 0.40-2.67        |
| <b>MBL2*</b><br>rs10824792<br>Ex4-1067G→A      | AA    | 63  | 25.4% | 1.00        | reference        | <b>MBL2*</b><br>rs2083771<br>Ex4-539C→A                      | AA    | 106 | 24.5% | 1.00        | reference        |
|                                                | AG    | 83  | 20.5% | 0.92        | 0.45-1.83        |                                                              | AC    | 71  | 18.3% | 0.81        | 0.41-1.57        |
|                                                | GG    | 33  | 15.2% | 0.54        | 0.19-1.49        |                                                              | CC    | 7   | 0.0%  |             |                  |
|                                                | Total | 179 |       |             | p=0.27           |                                                              | Total | 184 |       |             | p=0.20           |
|                                                | AG/GG | 116 | 19.0% | 0.79        | 0.40-1.52        |                                                              | AC/CC | 78  | 16.7% | 0.72        | 0.36-1.41        |

|              |       |     |        |      |           |                   |       |     |       |      |           |
|--------------|-------|-----|--------|------|-----------|-------------------|-------|-----|-------|------|-----------|
| <b>SELE*</b> | AA    | 149 | 22.1%  | 1.00 | reference | <b>STAT1*</b>     | CC    | 102 | 23.5% | 1.00 | reference |
| rs5361       | AC    | 37  | 16.2%  | 0.58 | 0.23-1.38 | rs2066804         | CT    | 74  | 17.6% | 0.66 | 0.33-1.30 |
| S149R        | CC    | 1   | 100.0% | 15.4 | 1.73-137. | IVS21-8C→T        | TT    | 10  | 20.0% | 1.22 | 0.27-5.43 |
| Ex4+24A→C    | Total | 187 |        |      | p=0.56    | (splice)          | Total | 186 |       |      | p=0.44    |
|              | AC/CC | 38  | 18.4%  | 0.67 | 0.29-1.53 |                   | CT/TT | 84  | 17.9% | 0.71 | 0.36-1.35 |
| <b>TLR4</b>  | AA    | 234 | 19.2%  | 1.00 | reference | <b>TNF</b>        | GG    | 199 | 21.1% | 1.00 | reference |
| rs4986790    | AG    | 30  | 33.3%  | 1.65 | 0.82-3.30 | rs1800629         | AG    | 69  | 23.2% | 1.10 | 0.61-1.95 |
| D299G        | GG    | 3   | 0.0%   |      |           | G-308A            | AA    | 7   | 0.0%  |      |           |
| Ex4+636A→G   | Total | 267 |        |      | p=0.48    | promoter          | Total | 275 |       |      | p=0.66    |
|              | AG/GG | 33  | 30.3%  | 1.49 | 0.73-3.00 |                   | AG/AA | 76  | 21.1% | 0.99 | 0.55-1.77 |
| <b>TNF</b>   | GG    | 235 | 18.7%  | 1.00 | reference | <b>TNF</b>        | CC    | 231 | 21.6% | 1.00 | reference |
| rs361525     | AG    | 28  | 32.1%  | 2.03 | 0.97-4.20 | rs1799724         | CT    | 37  | 16.2% | 0.55 | 0.23-1.30 |
| A-417G       | AA    | 2   | 0.0%   |      |           | -1036C→T          | TT    | 3   | 0.0%  |      |           |
| aka G-238A   | Total | 265 |        |      | p=0.15    | aka C-857T        | Total | 271 |       |      | p=0.09    |
|              | AG/AA | 30  | 30.0%  | 1.90 | 0.91-3.94 |                   | CT/TT | 40  | 15.0% | 0.50 | 0.21-1.18 |
| <b>TNF</b>   | CC    | 173 | 22.0%  | 1.00 | reference | <b>TNFRSF10A*</b> | CC    | 184 | 21.2% | 1.00 | reference |
| rs1800630    | AC    | 65  | 20.0%  | 1.18 | 0.62-2.23 | rs20577           | CT    | 4   | 25.0% | 0.77 | 0.10-5.86 |
| -1042A→C     | AA    | 14  | 21.4%  | 1.12 | 0.33-3.71 | T33I              | TT    | 0   | 0.0%  |      |           |
| aka C-863A   | Total | 252 |        |      | p=0.66    | Ex1+163C→T        | Total | 188 |       |      | p=0.80    |
|              | AC/AA | 79  | 20.3%  | 1.17 | 0.64-2.12 |                   | CT/TT | 4   | 25.0% | 0.77 | 0.10-5.86 |
| <b>VCAM1</b> | TT    | 180 | 20.6%  | 1.00 | reference | <b>VCAM1</b>      | AA    | 245 | 19.6% | 1.00 | reference |
| rs1041163    | CT    | 83  | 21.7%  | 0.90 | 0.51-1.58 | rs3176879         | AG    | 17  | 23.5% | 1.14 | 0.40-3.20 |
| -1591T→C     | CC    | 5   | 0.0%   |      |           | K644K             | GG    | 4   | 25.0% | 1.13 | 0.15-8.27 |
|              | Total | 268 |        |      | p=0.35    | Ex9+149G→A        | Total | 266 |       |      | p=0.79    |
|              | CT/CC | 88  | 20.5%  | 0.83 | 0.47-1.46 |                   | AG/GG | 21  | 23.8% | 1.14 | 0.45-2.87 |

<sup>†</sup>HR adjusted for clinical and demographic factors.

<sup>‡</sup>Does not sum to 278 due to missing genotype. For genes with \*, only blood-based genotyping was conducted, and these genes were not eligible for multi-SNP models (N=21)
