# Supplementary material
Source: PubMed Central journal article supplement (PMC1890834)
Supplement: blood_blood-2006-11-058040_2.pdf [file blood_blood-2006-11-058040_2.pdf]

| Haplotype      |                          |                          |                          |                     |                      | Haplotype % | HR*              | P    |
|----------------|--------------------------|--------------------------|--------------------------|---------------------|----------------------|-------------|------------------|------|
| <b>LTA/TNF</b> | rs909253<br>LTA A/G      | rs2239704<br>LTA C/A     | rs1800629<br>TNF G/A     | rs361525<br>TNF G/A | rs1799724<br>TNF C/T |             |                  |      |
| 1              | A                        | A                        | G                        | G                   | C                    | 30%         | reference        |      |
| 2              | A                        | A                        | G                        | G                   | T                    | 7%          | 0.36             | 0.03 |
| 3              | A                        | C                        | G                        | A                   | C                    | 5%          | 1.11             | 0.78 |
| 4              | A                        | C                        | G                        | G                   | C                    | 21%         | 0.71             | 0.25 |
| 5              | G                        | A                        | A                        | G                   | C                    | <1%         |                  |      |
| 6              | G                        | A                        | G                        | G                   | C                    | <1%         |                  |      |
| 7              | G                        | A                        | G                        | G                   | T                    | <1%         |                  |      |
| 8              | G                        | C                        | A                        | G                   | C                    | 15%         | 0.68             | 0.23 |
| 9              | G                        | C                        | G                        | G                   | C                    | 19%         | 0.61             | 0.10 |
|                |                          |                          |                          |                     |                      |             | all haplo p=0.20 |      |
| <b>IL10</b>    | rs1800871<br>IL10_01 C/T | rs1800872<br>IL10_02 C/A | rs1800896<br>IL10_03 A/G |                     |                      |             |                  |      |
| 1              | C                        | C                        | A                        |                     |                      | 28%         | 1.28             | 0.25 |
| 2              | C                        | C                        | G                        |                     |                      | 45%         | reference        |      |
| 3              | T                        | A                        | A                        |                     |                      | 27%         | 0.84             | 0.46 |
| 4              | T                        | C                        | A                        |                     |                      | <1%         |                  |      |
|                |                          |                          |                          |                     |                      |             | all haplo p=0.26 |      |
| <b>IL8</b>     | rs4073<br>IL8 T/A        | rs2227307<br>IL8 T/G     | rs2227306<br>IL8 C/T     |                     |                      |             |                  |      |
| 1              | A                        | G                        | C                        |                     |                      | 5.9%        | 0.93             | 0.81 |
| 2              | A                        | G                        | T                        |                     |                      | 40.6%       | 0.69             | 0.07 |
| 3              | A                        | T                        | C                        |                     |                      | 1.8%        |                  |      |
| 4              | T                        | T                        | C                        |                     |                      | 51.8%       | reference        |      |
|                |                          |                          |                          |                     |                      |             | all haplo p=0.20 |      |
| <b>IL8RB</b>   | rs1126579<br>IL8RB C/T   | rs2230054<br>IL8RB T/C   | rs1126580<br>IL8RB A/G   |                     |                      |             |                  |      |
| 1              | C                        | C                        | A                        |                     |                      | 2.6%        |                  |      |
| 2              | C                        | C                        | G                        |                     |                      | 2.6%        |                  |      |
| 3              | C                        | T                        | A                        |                     |                      | 37.0%       | reference        |      |
| 4              | C                        | T                        | G                        |                     |                      | 12.7%       | 0.41             | 0.07 |
| 5              | T                        | C                        | A                        |                     |                      | 25.3%       | 0.44             | 0.01 |
| 6              | T                        | C                        | G                        |                     |                      | 19.6%       | 0.96             | 0.88 |
| 7              | T                        | T                        | A                        |                     |                      | 0.0%        |                  |      |
| 8              | T                        | T                        | G                        |                     |                      | 0.3%        |                  |      |
|                |                          |                          |                          |                     |                      |             | all haplo p=0.06 |      |

\*Hazard ratio, adjusted for age, clinical and demographic factors.
