# Supplementary material
Source: PubMed Central journal article supplement (PMC1890834)

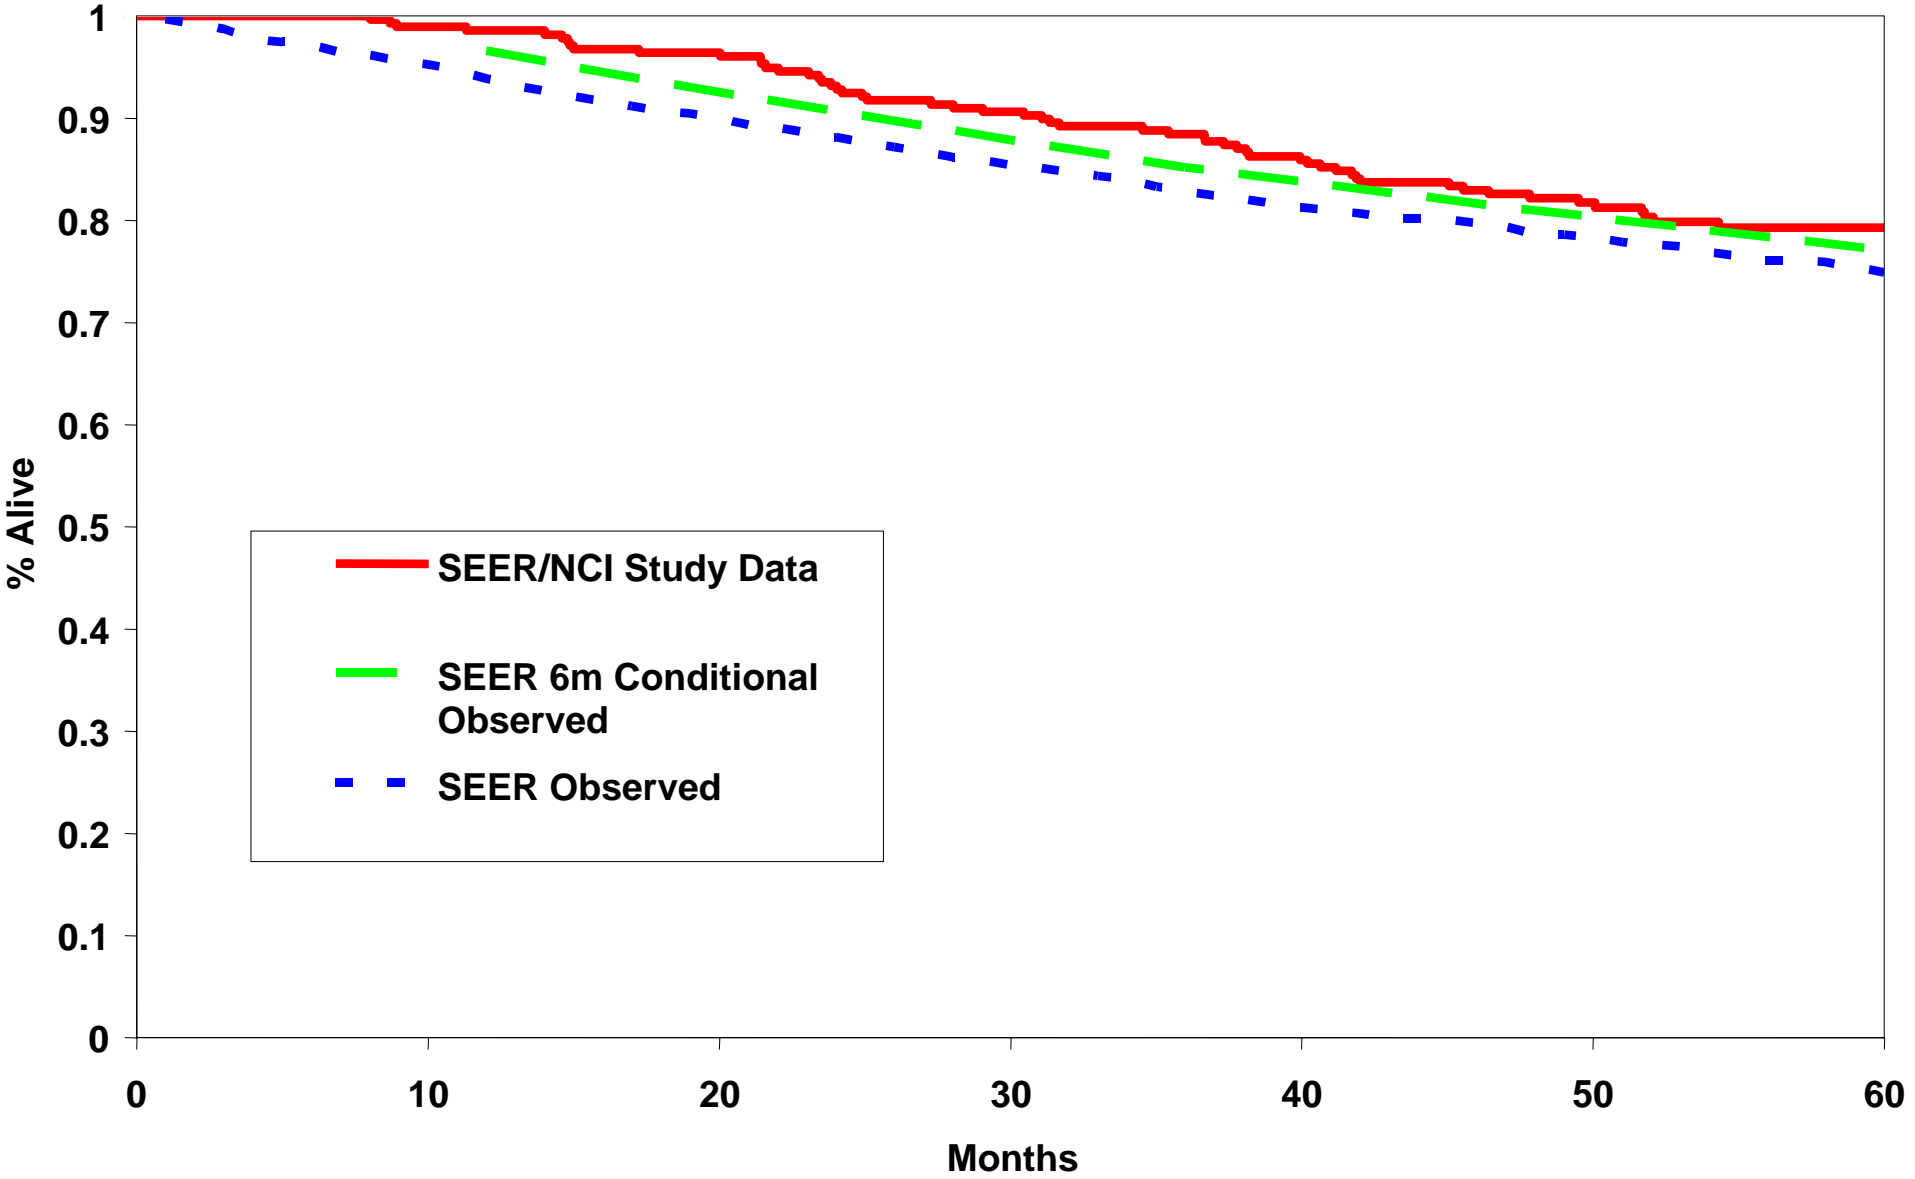

Supplement: blood_blood-2006-11-058040_3.pdf [file blood_blood-2006-11-058040_3.pdf]
